# Supplementary material for: Evaluation of approaches to strengthen civil registration and vital statistics systems: A systematic review and synthesis of policies in 25 countries
Source: PubMed Central journal article supplement (PMC6764661; doi:10.1371/journal.pmed.1002929), 2019-09-27
Supplement: pmed.1002929.s004.pdf [file pmed.1002929.s004.pdf]

## Individual study quantitative results

| Article         | Country      | Policy                    | Geographic scale       | Years of implementation (I), comparator result (CR), and intervention result (IR) | Vital events measured | Comparator used                                                                                                         | Comparator result                                                                                                                                                             | Intervention result                                                                                                                                                               |
|-----------------|--------------|---------------------------|------------------------|-----------------------------------------------------------------------------------|-----------------------|-------------------------------------------------------------------------------------------------------------------------|-------------------------------------------------------------------------------------------------------------------------------------------------------------------------------|-----------------------------------------------------------------------------------------------------------------------------------------------------------------------------------|
| Garenne, 2016   | South Africa | Supply, Demand, Incentive | Agincourt (rural area) | I: 1992-2014, CR: 1992, IR: 2014                                                  | Births and deaths     | Baseline year                                                                                                           | 7.8% births; 51.4% deaths                                                                                                                                                     | 90.5% births; 97.1% deaths                                                                                                                                                        |
| Dababneh, 2015  | Jordan       | Supply                    | National               | I: 2003 on, CR: 2004, IR: 2011                                                    | Deaths                | Death notification forms received by MOH as a percentage of forms reported to the Civil Status and Passports Department | 71.9%                                                                                                                                                                         | 77.7%                                                                                                                                                                             |
| Joubert, 2013   | South Africa | Supply                    | National               | I: 1992 on, CR: 1998, IR: 2007                                                    | Deaths                | Baseline year                                                                                                           | 73% male deaths; 63% female                                                                                                                                                   | 87% male deaths; 79% female                                                                                                                                                       |
| Kabadi, 2013    | Tanzania     | Supply                    | Rufiji district        | I: Sep 2012-Mar 2013, CR: Sep 2011-Feb 2012, IR: Sept 2012-Feb 2013               | Births and deaths     | Baseline period                                                                                                         | 564 births notified (28% of all births), 285 births registered (51% of notified births); 29 deaths notified (2% of all deaths), 13 deaths registered (45% of notified deaths) | 1,048 births notified (51% of all births), 312 births registered (30% of notified births); 165 deaths notified (14% of all deaths), 19 deaths registered (12% of notified deaths) |
| Ozdemir, 2015   | Turkey       | Supply                    | National, Izmir        | I: 2001-2013, CR: 2001-2008, IR: 2009-2013                                        | Deaths                | Baseline period                                                                                                         | National: 57.7% males 61.1% females; Izmir: 80.0% males 72.4% females                                                                                                         | National: 99.2% males 97.0% females; Izmir: 103.9% males 102.0% females                                                                                                           |
| Robertson, 2013 | Zimbabwe     | Incentive                 | Manicaland             | I: 2010-2011                                                                      | Births                | Control group                                                                                                           | 45% (163/366)                                                                                                                                                                 | 48% (255/528) UCT; 60% (252/417) CCT                                                                                                                                              |
| Fagernas, 2013  | Ghana        | Supply, Demand            | National               | I: 2004-2005, CR: 2003, IR: 2008                                                  | Births                | Baseline year                                                                                                           | 44%                                                                                                                                                                           | 71%                                                                                                                                                                               |

|                |              |                                 |                                                    |                                                |                      |                                                      |                             |                                           |
|----------------|--------------|---------------------------------|----------------------------------------------------|------------------------------------------------|----------------------|------------------------------------------------------|-----------------------------|-------------------------------------------|
| Singh, 2012    | India        | Supply                          | Haryana                                            | I: 2005-2009, CR: 2004, IR: 2009               | Births and deaths    | Baseline year                                        | 70% births;<br>73.5% deaths | 95% births;<br>92.1% deaths               |
| Singogo, 2013  | Malawi       | Supply                          | Traditional Authority<br>Mwambo, Zomba<br>district | I: 2007-2011, CR:<br>2011, IR: 2011            | Births and<br>deaths | Maternity<br>registers (for<br>birth events<br>only) | 6397 births                 | 1753 births                               |
| Upham, 2012    | South Africa | Supply,<br>Demand,<br>Incentive | National                                           | I: 1997-2004, CR:<br>1997, IR: 2004            | Births and<br>deaths | Baseline year                                        | 63% deaths                  | 82% deaths;<br>almost<br>universal births |
| Mony, 2011     | India        | Supply, Demand                  | Five subdistricts in<br>southern India             | I: Sep 2007-Aug<br>2008, CR: 2007,<br>IR: 2008 | Births and<br>deaths | Baseline year                                        | 50% births;<br>25% deaths   | 80% births;<br>61% deaths                 |
| UNICEF, 2010   | Bangladesh   | Supply,<br>Demand,<br>Incentive | National                                           | I: 1996 on, CR:<br>1996, IR: 2006 and<br>2008  | Births               | Baseline year                                        | 7%                          | 10% in 2006;<br>40% in 2008               |
| UNICEF, 2010   | Brazil       | Supply,<br>Demand,<br>Incentive | National                                           | I: 1997-2008, CR:<br>1995, IR: 2007            | Births               | Baseline year                                        | 69.7%                       | 87.8%                                     |
| UNICEF, 2010   | Gambia       | Supply, Demand                  | National                                           | I: 1996-2006, CR:<br>2000, IR: 2006            | Births               | Baseline year                                        | 32%                         | 55%                                       |
| Rao, 2004      | South Africa | Supply, Demand                  | National                                           | I: 1990 on, CR:<br>1990, IR: 1999-<br>2000     | Deaths               | Baseline year                                        | 54%                         | 89%                                       |
| Woodward, 2003 | Canada       | Penalty                         | Ontario                                            | I: 1996, CR: 1991,<br>IR: 1996                 | Births               | Baseline year                                        | 99.4%                       | 99%                                       |
| UNICEF, 2013   | Brasil       | Supply,<br>Incentive            | National                                           | I: 1999-2008<br>CR: 1998<br>IR: 2008           | Births               | Baseline year                                        | 64%                         | 91%                                       |
